# Supplementary material
Source: PubMed Central journal article supplement (PMC1287978)

\*MSD2 SPC, time=1.477:1.680 of ASHVASHE3158.D API-ES, Pos, SIM, Frag: 50

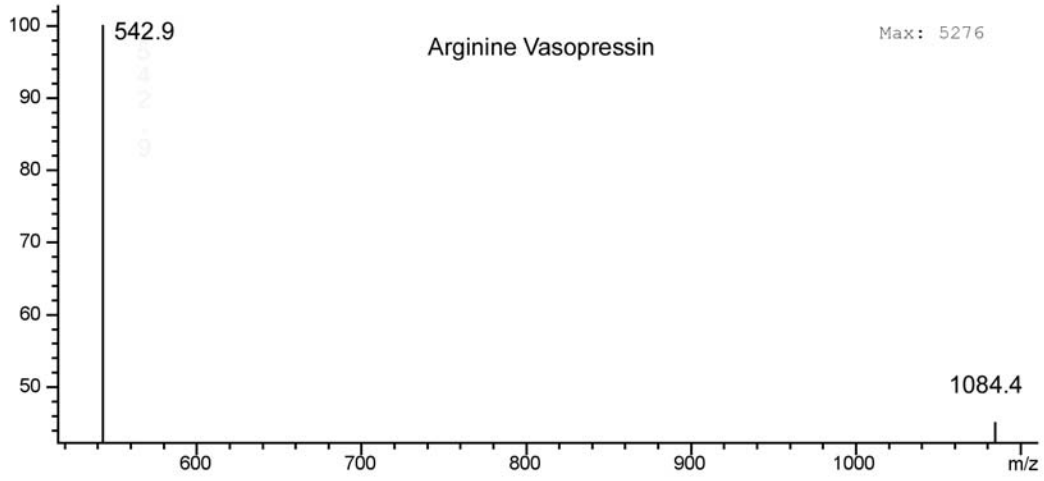

\*MSD1 SPC, time=1.482:1.666 of ASHVASHE3158.D API-ES, Pos, SIM, Frag: 50

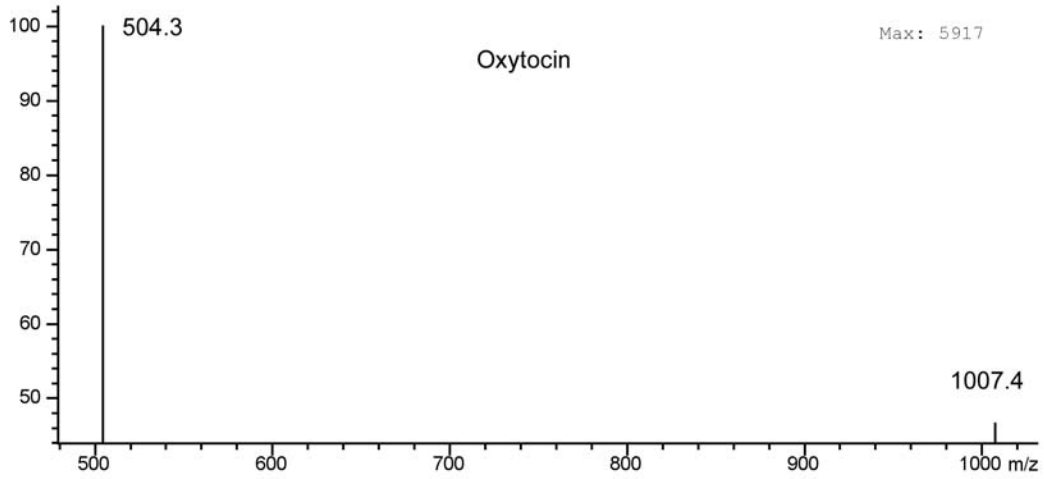

Supplement: pnas_0504767102_1.pdf [file pnas_0504767102_1.pdf]
